# Supplementary material
Source: publisher site journal article supplement (https://www.dovepress.com/article/284064)

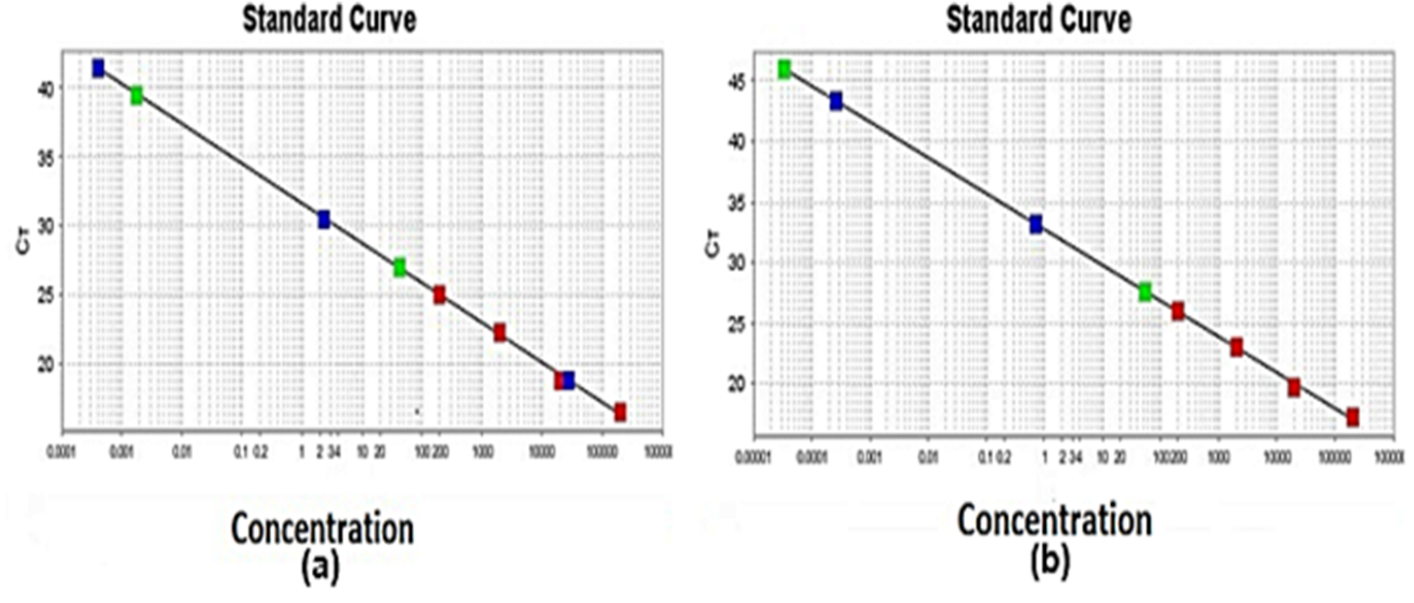


**Supplementary figure 1**: Standard curves of (a) hMito mitochondrial and (b) hB2M genomic gene.

Supplement: Supplementary file 1 [file get_supplementary_file.php]
